# Supplementary material
Source: publisher figshare collection journal article supplement (https://tandf.figshare.com/ndownloader/files/15461264)
Supplement: Supplementary file 1 [file 15461264]

| Accession | Adaxial (mol m-2 s-1) | Abaxial (mol m-2 s-1) | Abaxial ratio to total conductance |
| --- | --- | --- | --- |
| IT00K-1263 | 0.68±0.05 a | 0.78±0.16 a | 0.53±0.06 a |
| IT97K-1042-3 | 0.68±0.16 a | 0.75±0.22 a | 0.52±0.06 a |
| IT99K-216-44 | 0.53±0.06 a | 0.76±0.06 a | 0.59±0.02 a |
| IT98K-205-8 | 0.64±0.11 a | 0.75±0.18 a | 0.53±0.08 a |

Table S1. Leaf stomatal conductance of the adaxial and abaxial surfaces.

Data are mean ± standard deviation (n=3) for each accession. Stomatal conductance were measured for the topmost fully expanded leaf of pot-grown plant at 4 weeks after sowing.
